# Supplementary material
Source: MDPI journal article supplement (https://www.mdpi.com/2673-9410/3/1/9)
Supplement: s1 [file s1]

Supplementary Table S1. Details of the experimental series evaluating the growth of holopelagic *Sargassum genotypes* (sargasso) at different temperatures.

| Experimental series | Genotypes                                       | Initial trial date | Final trial date |
|---------------------|-------------------------------------------------|--------------------|------------------|
| 1                   | <i>S. fluitans</i> III vs <i>S. natans</i> VIII | 14/04/2021         | 19/04/2021       |
|                     | <i>S. fluitans</i> III vs <i>S. natans</i> VIII | 26/04/2021         | 31/05/2021       |
|                     | <i>S. fluitans</i> III vs <i>S. natans</i> VIII | 09/05/2021         | 14/05/2021       |
|                     | <i>S. fluitans</i> III vs <i>S. natans</i> VIII | 22/05/2021         | 27/05/2021       |
| 2                   | <i>S. fluitans</i> III vs <i>S. natans</i> I    | 02/07/2021         | 07/07/2021       |
|                     | <i>S. fluitans</i> III vs <i>S. natans</i> I    | 15/07/2021         | 20/07/2021       |
| 3                   | <i>S. natans</i> I vs <i>S. natans</i> VIII     | 02/10/2021         | 07/10/2021       |
|                     | <i>S. natans</i> I vs <i>S. natans</i> VIII     | 11/10/2021         | 16/10/2021       |
|                     | <i>S. natans</i> I vs <i>S. natans</i> VIII     | 27/10/2021         | 01/11/2021       |

Supplement: Additional data on experimental series and Statistical tests

Supplementary Table S2: Two-way ANOVA testing for differences in relative growth rates of sargasso by genotype and temperature. Bold values indicate statistical significance at  $p < 0.05$ .

|                                                                        | MS    | Df | F    | <i>p</i>     |
|------------------------------------------------------------------------|-------|----|------|--------------|
| Experimental series 1: <i>S. fluitans</i> III vs <i>S. natans</i> VIII |       |    |      |              |
| Genotype                                                               | 0.002 | 1  | 5.0  | <b>0.030</b> |
| Temperature                                                            | 0.002 | 3  | 3.7  | <b>0.017</b> |
| Genotype $\times$ temperature                                          | 0.001 | 3  | 3.4  | <b>0.025</b> |
| Experimental series 2: <i>S. fluitans</i> III vs <i>S. natans</i> I    |       |    |      |              |
| Genotype                                                               | 0.000 | 1  | 0.08 | 0.77         |
| Temperature                                                            | 0.001 | 3  | 0.84 | 0.48         |
| Genotype $\times$ temperature                                          | 0.001 | 3  | 0.73 | 0.54         |
| Experimental series 3: <i>S. natans</i> I vs <i>S. natans</i> VIII     |       |    |      |              |
| Genotype                                                               | 0.001 | 1  | 4.69 | <b>0.03</b>  |
| Temperature                                                            | 0.000 | 3  | 0.73 | 0.53         |
| Genotype $\times$ temperature                                          | 0.000 | 3  | 0.26 | 0.84         |

Supplementary Table S3: Two-way ANOVA testing for differences in relative growth rate of sargasso by season and temperature. Bold values indicate statistical significance at  $p < 0.05$ .

|                             | MS    | Df | F    | <i>p</i>     |
|-----------------------------|-------|----|------|--------------|
| <i>S. fluitans</i> III      |       |    |      |              |
| Season                      | 0.000 | 1  | 0.7  | 0.42         |
| Temperature                 | 0.002 | 3  | 3.6  | <b>0.02</b>  |
| Season $\times$ temperature | 0.000 | 3  | 0.6  | 0.63         |
| <i>S. natans</i> I          |       |    |      |              |
| Season                      | 78.81 | 1  | 10.7 | <b>0.003</b> |
| Temperature                 | 4.60  | 3  | 0.6  | 0.60         |
| Season $\times$ temperature | 8.82  | 3  | 1.2  | 0.32         |
| <i>S. natans</i> VIII       |       |    |      |              |
| Season                      | 0.009 | 1  | 33.9 | <b>0.000</b> |
| Temperature                 | 0.001 | 3  | 2.1  | 0.115        |
| Season $\times$ temperature | 0.000 | 3  | 0.9  | 0.436        |
